# Supplementary material
Source: PubMed Central journal article supplement (PMC3408179)
Supplement: supp_M112.378737_jbc.M112.378737-2.pdf [file supp_M112.378737_jbc.M112.378737-2.pdf]

Supplementary Figure 1. **RTX treatment ablates TRPV1- and IB4-positive DRG neurons and their afferent terminals in the spinal cord.** A, representative confocal images depict TRPV1 (green)-immunoreactive and IB4 positive (red)-DRG neurons from one vehicle- and one RTX-treated rat. B, confocal images show TRPV1 (green)-immunoreactive and IB4 positive (red)-afferent terminals in the spinal dorsal horn of one vehicle- and one RTX-treated rat. All images are single confocal optical sections.
