# Supplementary material
Source: PubMed Central journal article supplement (PMC3408179)

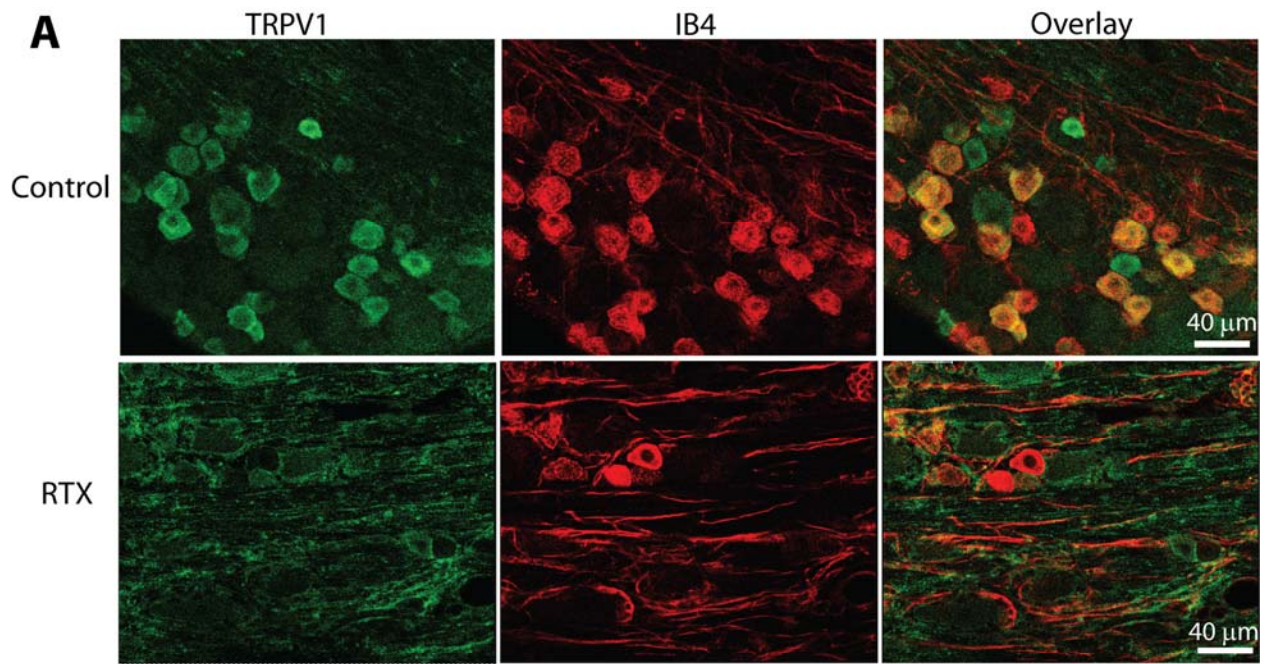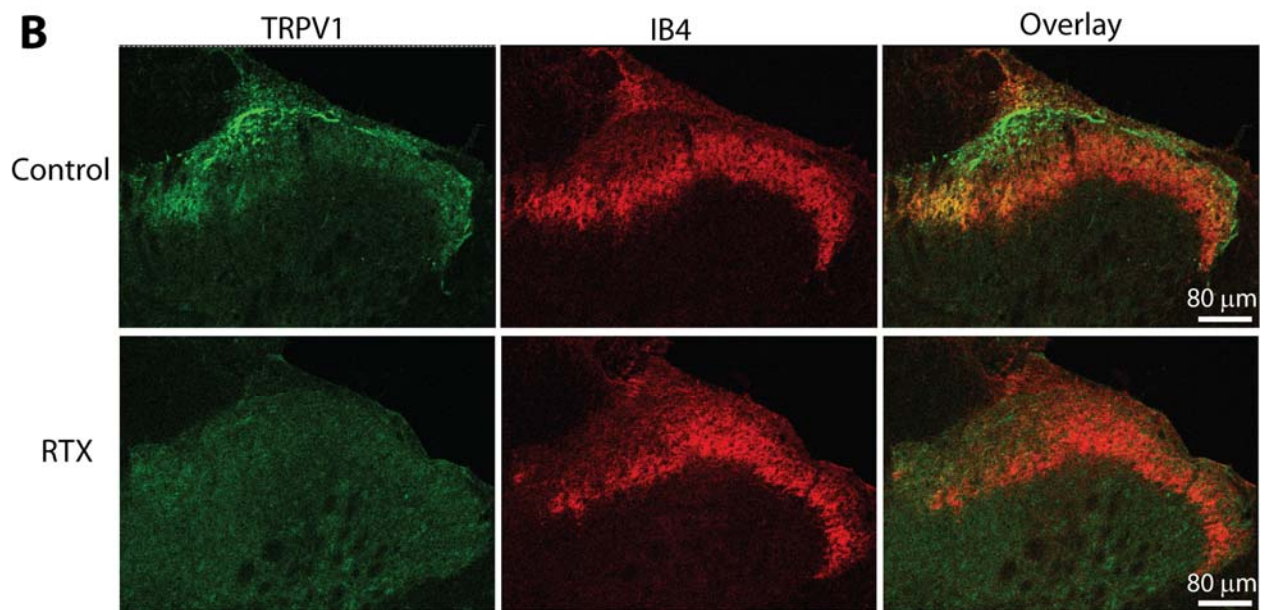

Supplement: supp_M112.378737_Fig1.pdf [file supp_M112.378737_Fig1.pdf]
